# Supplementary material for: Ultrathin V2O5nanosheet cathodes: realizing ultrafast reversible lithium storage
Source: Royal Society of Chemistry journal article supplement (doi:10.1039/c2nr33422d), 2012-12-03
Supplement: c2nr33422d.pdf [file c2nr33422d.pdf]

Supplementary Information for

## **Ultrathin V<sub>2</sub>O<sub>5</sub> Nanosheet Cathodes: Realizing Ultrafast Reversible Lithium Storage**

Xianhong Rui,<sup>ab</sup> Ziyang Lu,<sup>a</sup> Hong Yu,<sup>a</sup> Dan Yang,<sup>a</sup> Huey Hoon Hng,<sup>a</sup> Tuti Mariana Lim,<sup>\*bc</sup> and Qingyu Yan<sup>\*ade</sup>

<sup>a</sup>*School of Materials Science and Engineering, Nanyang Technological University, 639798, Singapore. E-mail: alexyan@ntu.edu.sg; Tel: +65 6790 4583; Fax: +65 6790 9081*

<sup>b</sup>*School of Civil and Environmental Engineering, Nanyang Technological University, 639798, Singapore. E-mail: tmlim@ntu.edu.sg*

<sup>c</sup>*School of Life Sciences and Chemical Technology, Ngee Ann Polytechnic, 599489, Singapore*

<sup>d</sup>*Energy Research Institute, Nanyang Technological University, 637459, Singapore*

<sup>e</sup>*TUM CREATE Centre for Electromobility, Nanyang Technological University, 637459, Singapore*

## Experimental

### Liquid-exfoliation of bulk V<sub>2</sub>O<sub>5</sub>

All the starting materials were of analytically pure grade and used as received. In a typical procedure, bulk V<sub>2</sub>O<sub>5</sub> powder (50 mg, Alfa Aesar) was added into a 100 mL glass bottle containing a formamide solution (50 mL, Sigma-Aldrich) and the whole mixture was shaken to suspend the powder and kept overnight. The resulting suspension was then sonicated at room temperature for 3 days. After ultrasonic treatment, the exfoliated V<sub>2</sub>O<sub>5</sub> nanosheets were isolated from the upper solution of glass bottle via centrifugation and washed with ethanol for several times to remove residual formamide, and then dried in oven (70 °C) overnight for further characterization. The yield of V<sub>2</sub>O<sub>5</sub> nanosheets is around 60%, which is determined by the weight percentage of exfoliated V<sub>2</sub>O<sub>5</sub> nanosheets to the bulk V<sub>2</sub>O<sub>5</sub> reactants.

### Materials Characterization

X-ray powder diffraction (XRD) patterns were recorded on a Bruker AXS D8 advance X-ray diffractometer at the 2θ range of 10 to 60° using Cu Kα radiation. The morphology was investigated by using a field-emission scanning electron microscopy (FESEM) system (JEOL, Model JSM-7600F), and the nanostructure was characterized by using a transmission electron microscopy (TEM) instrument (JEOL, Model JEM-2010) operating at 200 kV. Nitrogen adsorption/desorption isotherms were conducted at 77 K (ASAP 2020). Atomic force microscopy (AFM) (Digital Instruments) was used to determine the thickness of the V<sub>2</sub>O<sub>5</sub> nanosheets.

### Electrochemical Measurements

The coin-type cells were assembled in an argon-filled glove-box, where both moisture and oxygen levels were less than 1 ppm. The cathodes were fabricated by mixing V<sub>2</sub>O<sub>5</sub> nanosheets or bulk V<sub>2</sub>O<sub>5</sub>, carbon black and poly(vinylidene fluoride) (PVDF) at a weight ratio of 80:10:10 in *n*-methyl-2-pyrrolidone (NMP) solvent. The resulting mixture was then pasted onto the aluminum foil and punched into small disks (Ø=14 mm). The working electrodes had a thickness of around 30 μm with a mass loading of ~1 mg. Lithium foils were used as anodes and the electrolyte solution was made of 1M LiPF<sub>6</sub> in ethylene carbonate (EC)/dimethyl carbonate (DMC) (1/1, w/w). The cells were tested on a NEWARE multi-channel battery test system with galvanostatic charge and discharge in the voltage range of 4.0-2.0 V. Electrochemical impedance spectra (frequency range: 0.001 ~ 10<sup>5</sup> Hz) of V<sub>2</sub>O<sub>5</sub> electrodes in coin-type cells were performed with an electrochemical workstation (CHI 660C) using lithium foils as reference and counter electrodes, and 1M LiPF<sub>6</sub> in EC/DMC (1/1, w/w) as the electrolyte.

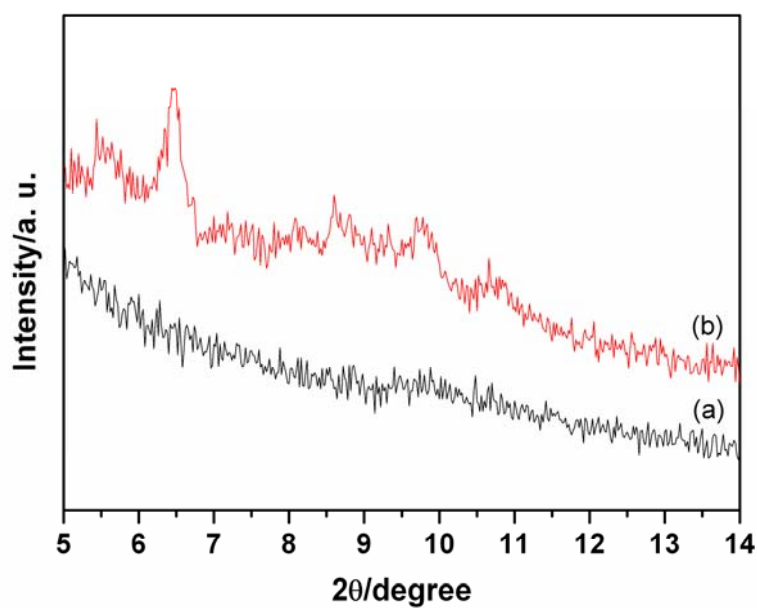

**Figure S1.** XRD patterns of bulk  $V_2O_5$  before (a) and after (b) immersing in the formamide solution for overnight. It can be clearly seen that the bulk  $V_2O_5$  after immersing in the formamide solution for overnight shows a new peak at a  $2\theta$  value of around  $6.5^\circ$  ( $d$ -spacing = 1.4 nm), indicating the intercalation of formamide molecules into the interlayer space of crystal  $V_2O_5$ .

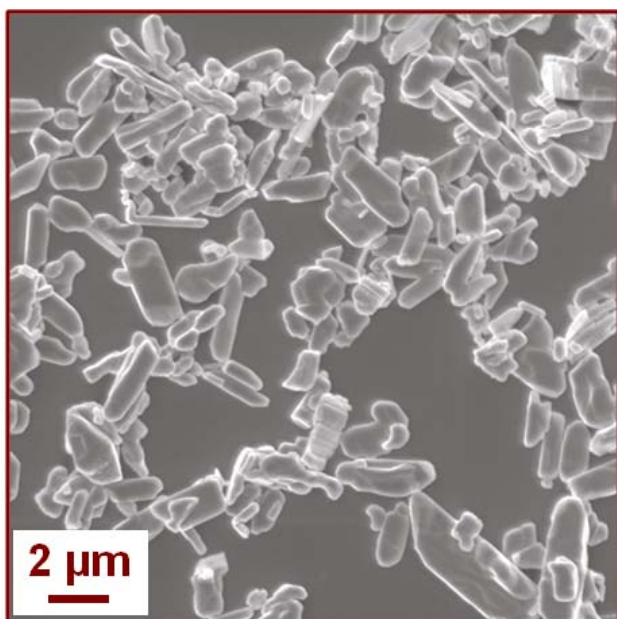

**Figure S2.** FESEM image of bulk V<sub>2</sub>O<sub>5</sub>.

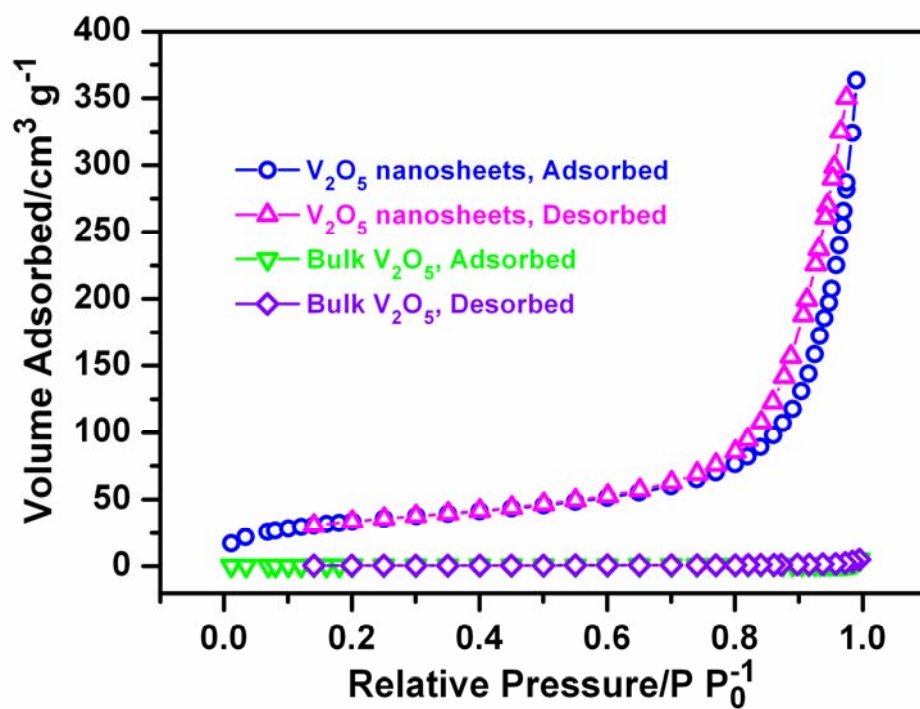

**Figure S3.** Nitrogen adsorption/desorption isotherms of bulk V<sub>2</sub>O<sub>5</sub> and ultrathin V<sub>2</sub>O<sub>5</sub> nanosheets.

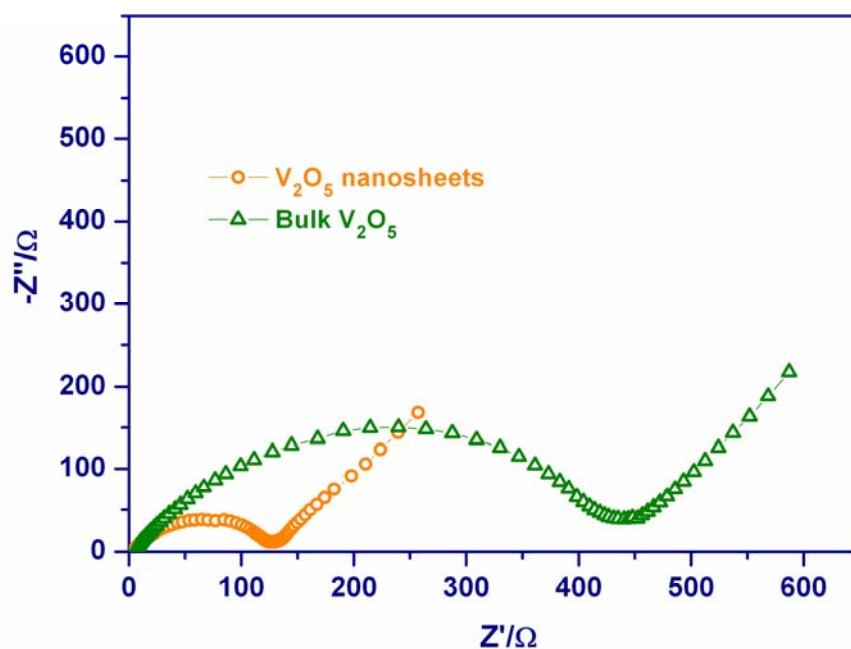

**Figure S4.** (a) Electrochemical impedance spectra of bulk V<sub>2</sub>O<sub>5</sub> and ultrathin V<sub>2</sub>O<sub>5</sub> nanosheet electrodes measured at the 4<sup>th</sup> fully discharged state. The high-middle frequency semicircle represents the charge-transfer process and a straight sloping line at low frequencies corresponds to Li<sup>+</sup> diffusion in solid electrode known as Warburg impedance.
